# Supplementary material for: Relationship of the Pine Growth Promoting Pantoea eucalypti FBS135 with Type Strains P. eucalypti LMG 24197T and P. vagans 24199T
Source: MDPI journal article supplement (doi:10.3390/life11070608), 2021-06-24
Supplement: s1 [file s1]

Supplemental figures:

|   | 1 | 2 | 3 | 4 | 5 | 6 | 7 | 8 | 9 | 10 | 11 | 12 |
|---|---|---|---|---|---|---|---|---|---|----|----|----|
| A |   |   |   |   |   |   |   |   |   |    |    |    |
| B |   |   |   |   |   |   |   |   |   |    |    |    |
| C |   |   |   |   |   |   |   |   |   |    |    |    |
| D |   |   |   |   |   |   |   |   |   |    |    |    |
| E |   |   |   |   |   |   |   |   |   |    |    |    |
| F |   |   |   |   |   |   |   |   |   |    |    |    |
| G |   |   |   |   |   |   |   |   |   |    |    |    |
| H |   |   |   |   |   |   |   |   |   |    |    |    |

**Figure S1.** ‘Phenotypic Fingerprint’ of FBS135 after six-day cultivation. The Biolog GEN III MicroPlate analyzes FBS135 in 94 phenotypic tests: 71 carbon source utilization assays (columns 1-9) and 23 chemical sensitivity assays (columns 10-12).

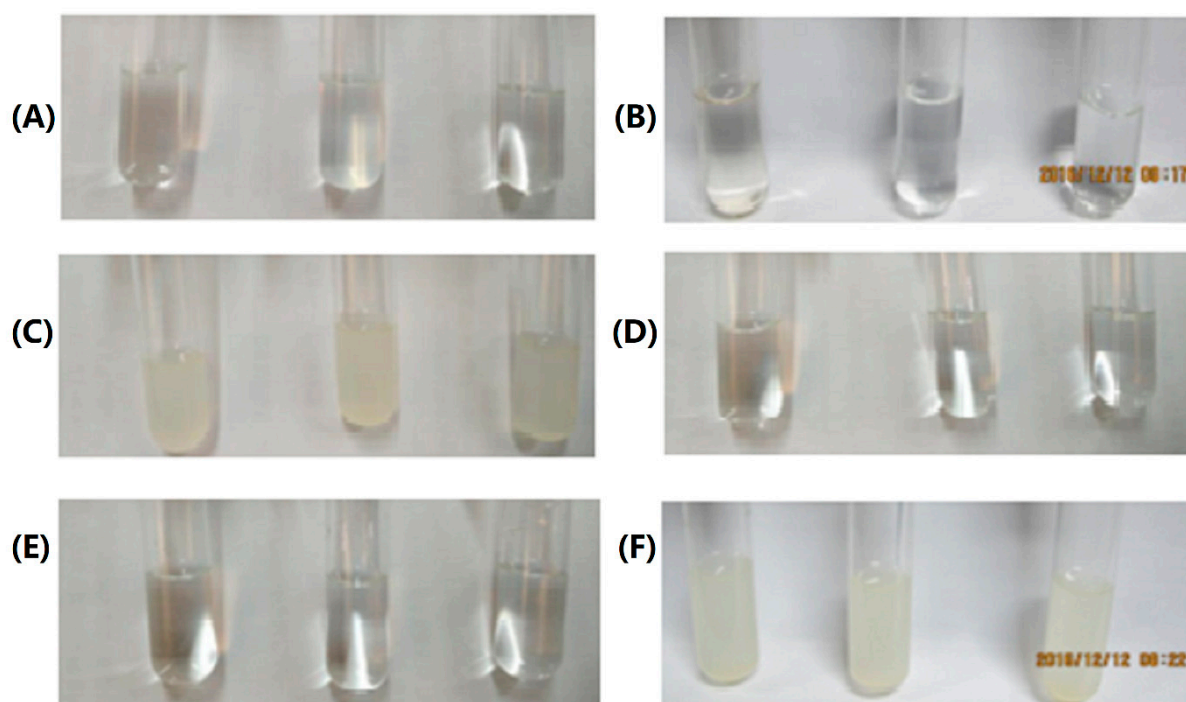

**Figure S2.** Utilization of single carbon source by FBS135 in six days. (A: Tween 40, B:  $\alpha$ -D-Lactose, C: Gentiobiose, D: L-histidine; E: L-pyroglutamic acid; F: Glucose).

Accordingly, the original S1 have been renamed as S3; original S2 have been renamed as S4; original S3 have been renamed as S5.

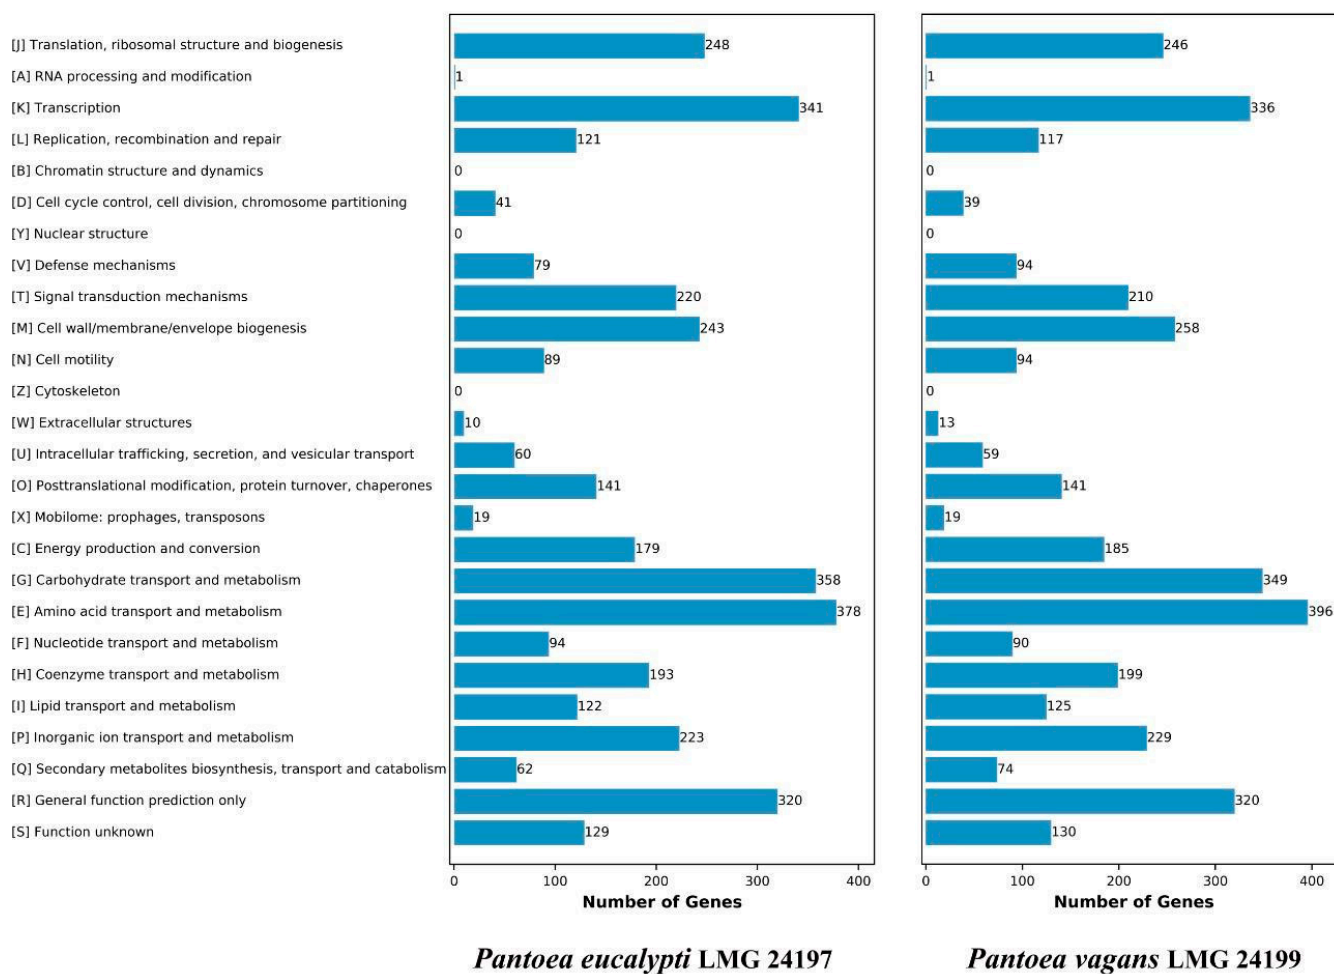

Figure S3. Classification and statistics of COG function of genome -encoded proteins.

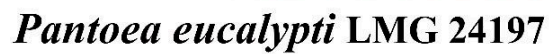

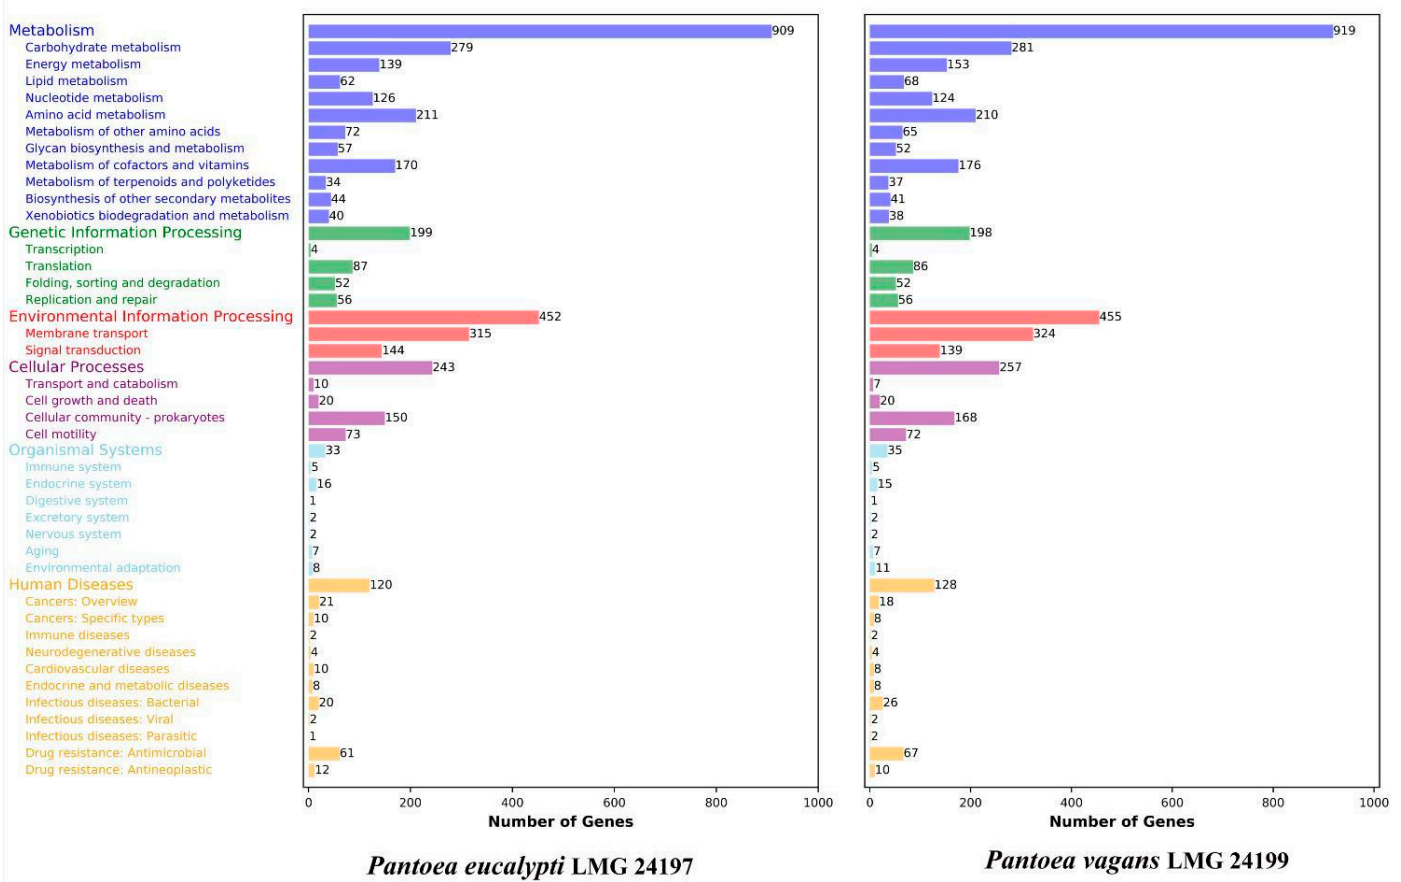

Figure S5. Statistics of KEGG functional classification of genome-encoded proteins.

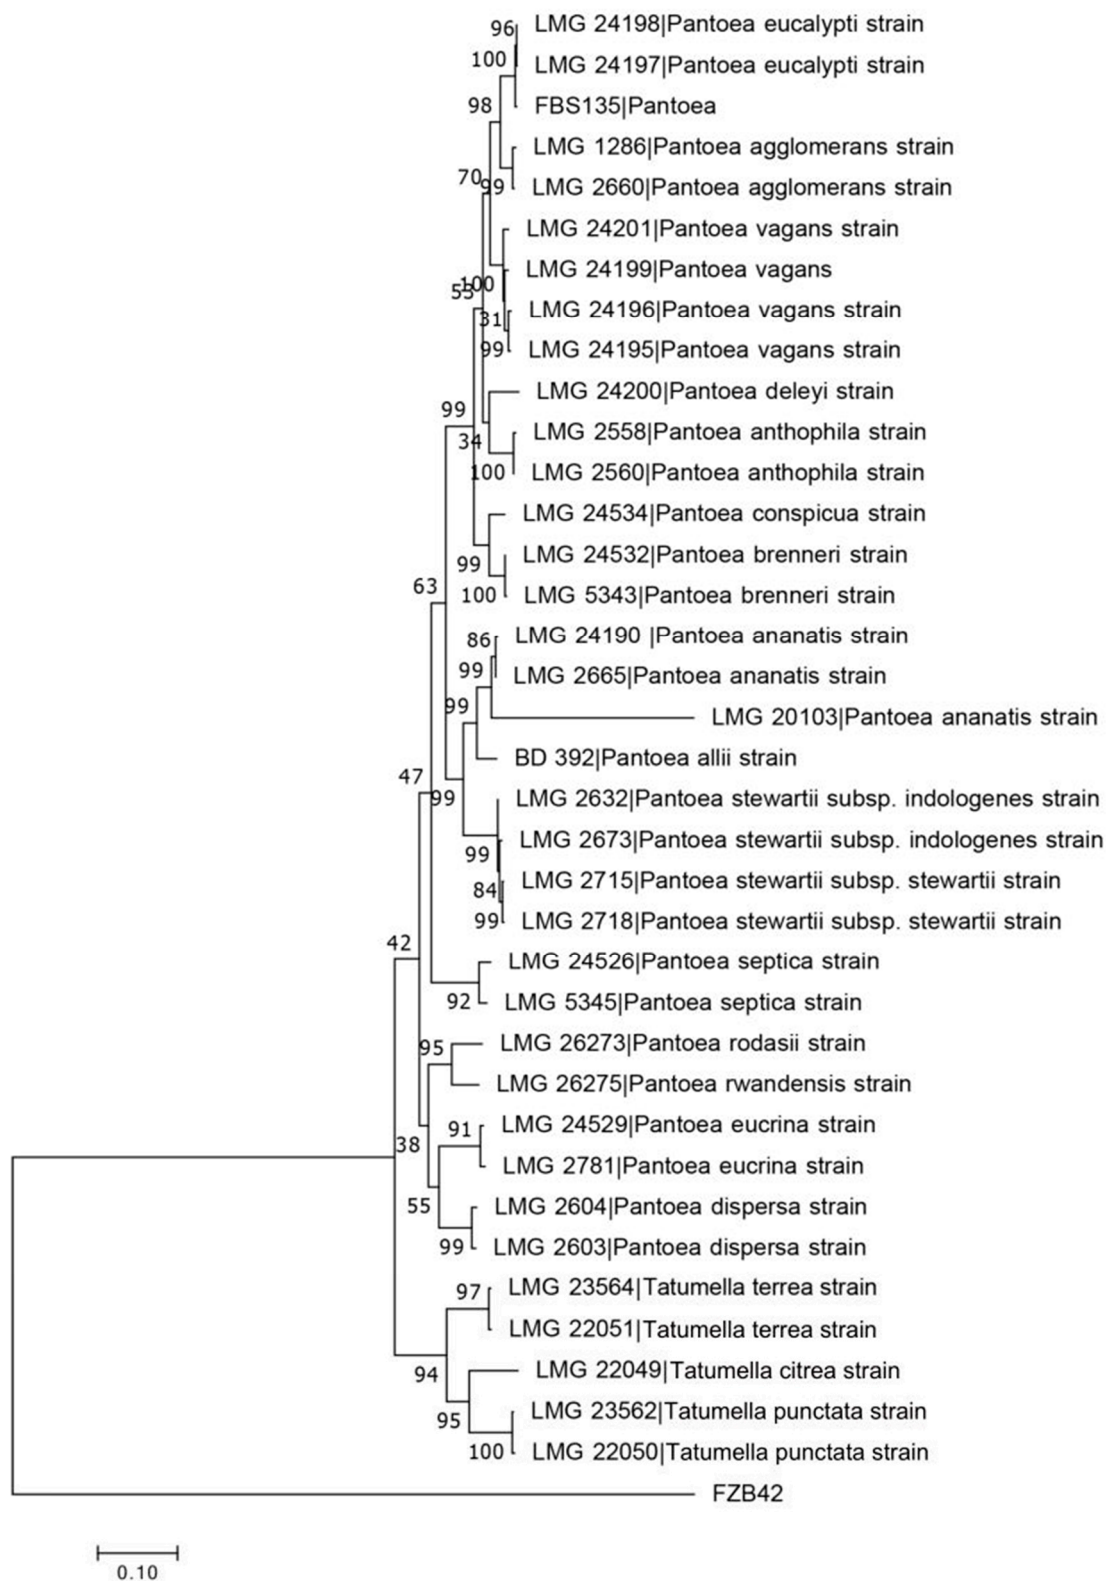

Figure S6. Phylogenetic tree constructed based on MLSA with four conserved genes (*rpoB*, *gyrB*, *infB*, *atpD*) using Maximum Likelihood method (repeated 1000 times).

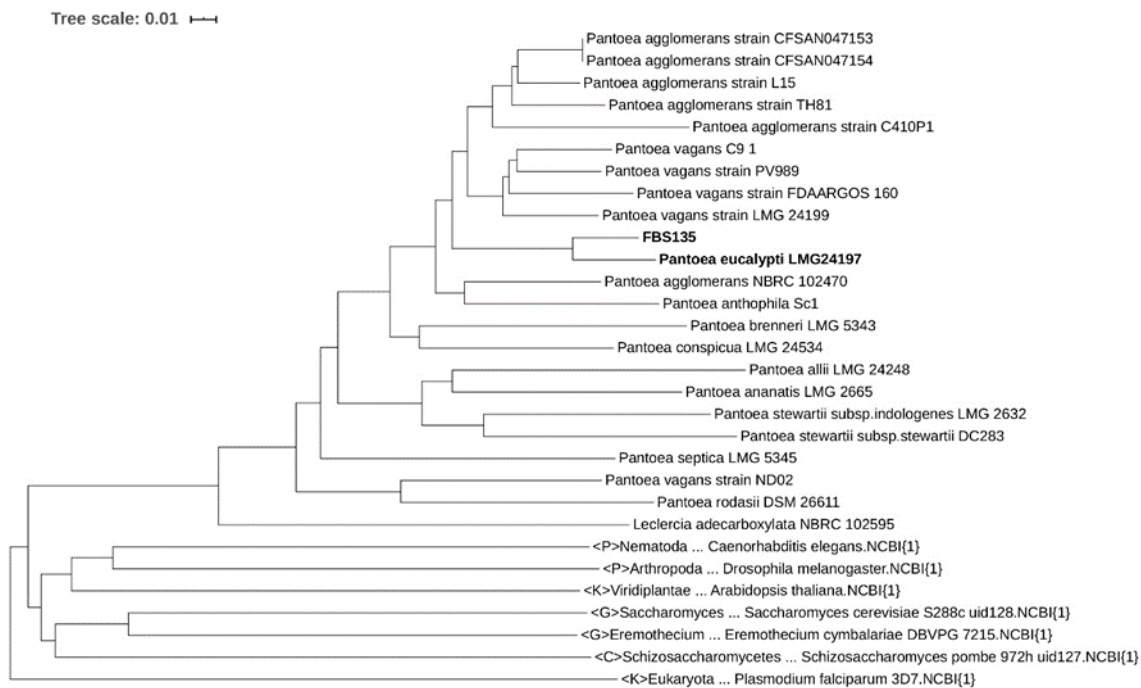

Figure S7. Phylogenetic analysis based on the whole genome sequence of FBS135
