# Supplementary material for: Relationship of the Pine Growth Promoting Pantoea eucalypti FBS135 with Type Strains P. eucalypti LMG 24197T and P. vagans 24199T
Source: MDPI journal article supplement (doi:10.3390/life11070608), 2021-06-24
Supplement: s1 [file s1]

## Supplementary Tables

**Table S1.** A Sequencing data statistics.

| Strain                 | Pantoea Vagans LMG 24199T |                | Pantoea Eucalypti LMG 24197T |                |
|------------------------|---------------------------|----------------|------------------------------|----------------|
| Type                   | Raw Reads                 | Filtered Reads | Raw Reads                    | Filtered Reads |
| Bases (bp)             | 1,432,460,598             | 1,378,041,586  | 2,519,894,578                | 2,517,577,992  |
| Reads number           | 126,071                   | 114,716        | 130,822                      | 126,539        |
| Reads mean length (bp) | 11,362                    | 12,012         | 19,262                       | 19,895         |
| Reads N50 (bp)         | 14,359                    | 14,481         | 31,522                       | 31,553         |
| Longest Reads (bp)     | 250,802                   | 137,167        | 202,879                      | 202,879        |

**Table S1.** B Assembly result statistics.

| Strain Name         | P. Eucalypti LMG 24197T | P. Vagans LMG 24199T |
|---------------------|-------------------------|----------------------|
| Genome size (bp)    | 4,798,990               | 4,790,329            |
| Contig Number       | 4                       | 3                    |
| Contig N50 (bp)     | 4,035,995               | 4,050,173            |
| Longest contig(bp)  | 4,035,995               | 4,050,173            |
| Shortest contig(bp) | 94,967                  | 180,464              |

**Table S2.** ncRNA prediction result statistics.

| strain     | Pantoea Vagans LMG 24199T |             | Pantoea Eucalypti LMG24197T |             |
|------------|---------------------------|-------------|-----------------------------|-------------|
|            | Number                    | Length (bp) | Number                      | Length (bp) |
| tRNA       | 80                        | 6,268       | 80                          | 6,292       |
| rRNA       | 22                        | 31,957      | 21                          | 31,862      |
| other      | 48                        | 7,387       | 46                          | 7,293       |
| regulatory | 40                        | 6,155       | 50                          | 7,688       |

**Table S3.** CRISPR prediction result.

| Strain             | Contig   | ID             | Start   | End     |
|--------------------|----------|----------------|---------|---------|
| Pantoea vagans LMG | tig00001 | CRISPR array 1 | 1197759 | 1198885 |
| 24199T             | tig00001 | CRISPR array 2 | 3172624 | 3173201 |

**Table S4.** Functional annotation statistics of genome-encoded proteins.

| Database               | FBS135 | Pantoea Vagans LMG 24199T | Pantoea Eucalypti LMG 24197T |
|------------------------|--------|---------------------------|------------------------------|
| COG                    | 2972   | 3180                      | 3144                         |
| KEGG                   | 2356   | 2842                      | 2812                         |
| GO                     |        | 2776                      | 2739                         |
| Refseq                 |        | 4273                      | 4357                         |
| Pfam                   |        | 3912                      | 3863                         |
| TIGRFAMs               |        | 1526                      | 1492                         |
| all databases          |        | 1228                      | 1215                         |
| at least one databases |        | 4273                      | 4359                         |
| Overall                |        | 4331                      | 4424                         |

**Table S5.** Strain information for phylogenetic analysis.

| Rank | Name                             | Strain      | Accession    | 16S rDNA Similarity (%) |
|------|----------------------------------|-------------|--------------|-------------------------|
| 1    | <i>Pantoea eucalypti</i>         | LMG 24197   | EF688009     | 99.33                   |
| 2    | <i>Pantoea vagans</i>            | LMG 24199   | EF688012     | 99.56                   |
| 3    | <i>Flavobacterium acidificum</i> | LMG 8364    | JX986959     | 99.35                   |
| 4    | <i>Pantoea brenneri</i>          | LMG 5343    | MIEI01000169 | 99.21                   |
| 5    | <i>Pantoea ananatis</i>          | LMG 2665    | JMJJ01000010 | 99.50                   |
| 6    | <i>Pantoea anthophila</i>        | LMG 2558    | EF688010     | 100                     |
| 7    | <i>Pantoea conspicua</i>         | LMG 24534   | MLFN01000105 | 99.35                   |
| 8    | <i>Pantoea allii</i>             | LMG 24248   | AY530795     | 99.28                   |
| 9    | <i>Pantoea agglomerans</i>       | DSM 3493    | AJ233423     | 99.14                   |
| 10   | <i>Pantoea deleyi</i>            | LMG 24200   | EF688011     | 99.35                   |
| 11   | <i>Pantoea indologenes</i>       | LMG 2632    | JPKO01000033 | 98.35                   |
| 12   | <i>Pantoea stewartii</i>         | LMG 2715    | Z96080       | 98.28                   |
| 14   | <i>Pantoea rodasii</i>           | LMG 26273   | MLFP01000054 | 97.35                   |
| 18   | <i>Leclercia adecarboxylata</i>  | NBRC 102595 | BCNP01000062 | 97.28                   |
| 19   | <i>Pantoea septica</i>           | LMG 5345    | MLJJ01000077 | 97.5                    |
| 20   | <i>Pantoea coffeiphila</i>       | Ca04        | KJ427829     | 98                      |
| 21   | <i>Pantoea rwandensis</i>        | LMG 26275   | MLFR01000061 | 96.85                   |

**Table S6.** Key parameters of phylogenetic analysis between FBS135 and *P. eucalypti* LMG 24197<sup>T</sup>.

| Category | Calculated Value | Cut-off Value |
|----------|------------------|---------------|
| MLSA (%) | 99               | 97            |
| gDDH (%) | 94.6*            | 70            |
| ANiB(%)  | 99.22            | 96            |
| ANIm (%) | 99.26            | 96            |
| TETRA    | 0.9997           | 0.998         |

\*: The lowest value calculated with the formula 2.

**Table S7.** Digital DNA-DNA hybridization results of FBS135 and two type strains.

|                           | Formula | DDH  | Model C.I.     | Distance | Prob.<br>DDH ≥ 70% | G+C<br>Difference |
|---------------------------|---------|------|----------------|----------|--------------------|-------------------|
| LMG 24197T<br>/LMG 24199T | 1       | 84.2 | [80.5 - 87.4%] | 0.111    | 94.49              | 1.05              |
| LMG 24197T<br>/LMG 24199T | 2       | 42.4 | [39.9 - 44.9%] | 0.0918   | 4.78               | 1.05              |
| LMG 24197T<br>/LMG 24199T | 3       | 75.9 | [72.5 - 79.1%] | 0.1926   | 90.29              | 1.05              |
| FBS135/LMG<br>24197T      | 1       | 95.3 | [93.1 - 96.9%] | 0.0492   | 98.73              | 0.29              |
| FBS135/LMG<br>24197T      | 2       | 94.6 | [92.9 - 95.9%] | 0.0071   | 97.11              | 0.29              |
| FBS135/LMG<br>24197T      | 3       | 96.9 | [95.5 - 97.9%] | 0.056    | 99.91              | 0.29              |
| FBS135/LMG<br>24199T      | 1       | 69.6 | [65.6 - 73.2%] | 0.1859   | 73.18              | 0.48              |

---

|                      |   |      |                |        |       |      |
|----------------------|---|------|----------------|--------|-------|------|
| FBS135/LMG<br>24199T | 2 | 42.3 | [39.8 - 44.9%] | 0.092  | 4.71  | 0.48 |
| FBS135/LMG<br>24199T | 3 | 64.2 | [60.9 - 67.4%] | 0.2608 | 46.06 | 0.48 |

---
